# Supplementary material
Source: publisher figshare collection journal article supplement (https://sage.figshare.com/ndownloader/files/20749506)
Supplement: Supplementary file 1 [file 20749506]

## **Appendix A**

### **Question Wording**

#### **Numeric Open-Ends**

- Q10 The next question is going to ask you about how often you've engaged in exercise. We want you to include walking, anything you may do around the house, or work you do on a job if you think they constitute exercise. So using that definition, **IN THE LAST WEEK**, on how many days did you do any exercise?
- Q19 **ON A TYPICAL DAY**, how many minutes do you spend on a computer?  
(DEFINITION: There are 1440 minutes in a 24 hour day.)
- Q20 **IN THE PAST WEEK**, how many email messages, if any, have you written or received?  
(Range 0 - 1,000)
- Q21A People do a number of different types of activities for leisure. Thinking about **THE PAST SEVEN DAYS**, how many times did you use the internet?  
(Range 0 - 1,000)
- Q21B [People do a number of different types of activities for leisure.] Thinking about the past seven days, how many times did you smoke a cigarette?  
[INTERVIEWER: We are interested in the total number of cigarettes. There are 20 cigarettes in a pack.]  
(Range 0 - 250)
- Q21C Drink alcohol [INTERVIEWER: We are interested in the total number of drinks.]  
(Range 0 - 50)
- Q21D Have sex  
(Range 0 - 50)
- Q21E Look at "adult" websites  
(Range 0 - 1,000)
- Q21F Read a book, magazine or newspaper  
(Range 0 - 250)
- Q22 Now I have a couple additional questions for you. During **THE LAST YEAR**, how many parking tickets have you received?  
(Range 0 - 400)
- Q23 During **THE LAST YEAR**, how many speeding tickets have you received?  
(Range 0 - 400)
- Q25 What is your age?  
(Range 18 - 120)

Q32 How many people, including yourself, live in your household?  
(Range 1 - 25)

Q33 How many of these, including yourself, are adults 18 years of age or older?  
(Range 1 - 25)

**Code into Numeric Range or Ordinal Category**

Q9 How many hours per week do you usually work at your job or do volunteer activities?

- 1 0-10 hours
- 2 11-20 hours
- 3 21-30 hours
- 4 31-40 hours
- 5 41-50 hours
- 1 51+ hours
- 8 (VOL) Don't know
- 9 (VOL) Refused

Q11 We have a few questions about how you spend your leisure time. About how many hours do you spend on leisure time each week?

- 1 0 hours
- 2 1-5 hours
- 3 6-10 hours
- 4 11-15 hours
- 5 16-20 hours
- 6 21+ hours
- 8 (VOL) Don't know
- 9 (VOL) Refused

Q12 About how many hours do you spend watching TV each week?

- 1 0 hours
- 2 1-5 hours
- 3 6-10 hours
- 4 11-15 hours
- 5 16-20 hours
- 6 21-25 hours
- 7 26-30 hours
- 8 31-35 hours
- 9 36-40 hours
- 10 41+ hours
- 88 (VOL) Don't know
- 99 (VOL) Refused

Q26 What is the last grade or class that you completed in school? [INTERVIEWER CODE, DO NOT READ]

- 1 None, or grade 1-8
- 2 High school incomplete (Grades 9-11)
- 3 High school graduate (Grade 12 or GED certificate)
- 4 Business, technical, or vocational school AFTER high school
- 5 Some college, no 4-year degree
- 6 College graduate (B.S., B.A., or other 4-year degree)
- 7 Post-graduate training or professional schooling after college (e.g., toward a Master's Degree or Ph.D.; law or medical school)
- 8 (VOL) Don't know
- 9 (VOL) Refused

**Code into Multiple Nominal Categories**

Q18 What kind of activities do you do online? (INTERVIEWER CODE AND PROBE FOR AT LEAST THREE ACTIVITIES – IF LESS THAN 3 ACTIVITIES MENTIONED, SELECT CHOICE 20 NO OTHER ACTIVITIES TO CONTINUE)

- 1 - Use the Internet
- 2 - Use a search engine (e.g., Google, Bing, Yahoo)
- 3 - Use email
- 4 - Facebook
- 5 - Twitter
- 6 - Pandora
- 7 - Read the news
- 8 - Read books
- 9 - Read magazines
- 10 - Watch movies or TV shows (e.g., Netflix, Hulu, Amazon Prime)
- 11 - Make purchases
- 12 - Do research for purchases made in person
- 13 - Look at restaurant reviews
- 14 - Visit "adult" websites
- 15 - Look up health information
- 16 - Check the stock market
- 17 - Look up recipes
- 18 - Identify exercise activities
- 19 - Other, Specify \_\_\_\_\_
- 20 - No more activities
- 88 - (VOL) Don't know
- 99 - (VOL) Refused

**Commented [JS1]:** Please do not make these changes as our original text accurately reflects what was in the questionnaire.

**Narrative Open Ends**

Q6 What kind of work do/did you do, that is, what is/was your occupation?  
[INTERVIEWER CODE ANSWERS VERBATIM]

Q14 What are other types of leisure activities that you do that we haven't asked you about?  
[INTERVIEWER RECORD ANSWER VERBATIM]

Q21G Thinking about all leisure activities that you do, what is your favorite leisure activity?  
[INTERVIEWER RECORD ANSWER VERBATIM]

**Appendix B**  
**Example Screen Shots Showing Visual Layout of Items**

**Numeric Open-Ends**

Progress55%

NavigateQ10GR

GOBackNextQuit

LANGGeneral comments (F6)Notes linked to a specific question (F5)New phone number

Q10GR

Q10. The next question is going to ask you about how often you've engaged in exercise. We want you to include walking, anything you may do around the house, or work you do on a job if you think they constitute exercise. So using that definition, IN THE LAST WEEK, on how many days did you do any exercise?

1Gave response

8(VOL) Don't know

9(VOL) Refused

Next

Progress55%

NavigateQ10

GOBackNextQuit

LANGGeneral comments (F6)Notes linked to a specific question (F5)New phone number

Q10

[RECORD NUMBER OF DAYS]

(Q10. The next question is going to ask you about how often you've engaged in exercise. We want you to include walking, anything you may do around the house, or work you do on a job if you think they constitute exercise. So using that definition, in the last week, on how many days did you do any exercise?)

[RANGE=0-7]

Next

Code into Numeric Range or Ordinal Categories

Progress  54%

Navigate : Q9

GO Back Next Quit

LANG

General comments (F6)

Notes linked to a specific question (F5)

New phone number

Q9

Q9. How many hours per week do you usually work at your job or do volunteer activities?

1

0-10 hours

2

11-20 hours

3

21-30 hours

4

31-40 hours

5

41-50 hours

6

51+ hours

8

(VOL) Don't know

9

(VOL) Refused

Next

Progress  86%

Navigate : Q26

GO Back Next Quit

LANG

General comments (F6)

Notes linked to a specific question (F5)

New phone number

Q26

Q26. What is the last grade or class that you completed in school?

[INTERVIEWER CODE, DO NOT READ]

1

None, or grade 1-8

2

High school incomplete (Grades 9-11)

3

High school graduate (Grade 12 or GED certificate)

4

Business, Technical, or vocational school AFTER high school

5

Some college, no 4-year degree

6

College graduate (B.S., B.A., or other 4-year degree)

7

Post-graduate training or professional schooling after college (e.g., toward a master's Degree or Ph.D.; law or medical school)

8

(VOL) Don't know

9

(VOL) Refused

Next

Progress 67%

Navigate: Q18

Q18

Q18. What kind of activities do you do online?

(INTERVIEWER CODE AND PROBE FOR AT LEAST THREE ACTIVITIES - IF LESS THAN 3 ACTIVITIES MENTIONED, SELECT CHOICE 20 NO OTHER ACTIVITIES TO CONTINUE)

- 01 ☐ Use the internet
- 02 ☐ Use a search engine (e.g., Google, Bing, Yahoo)
- 03 ☐ Use email
- 04 ☐ Facebook
- 05 ☐ Twitter
- 06 ☐ Pandora
- 07 ☐ Read the news
- 08 ☐ Read books
- 09 ☐ Read magazines
- 10 ☐ Watch movies or TV shows (e.g., Netflix, Hulu, Amazon Prime)
- 11 ☐ Make purchases
- 12 ☐ Do research for purchases made in person
- 13 ☐ Look at restaurant reviews
- 14 ☐ Visit "adult" websites
- 15 ☐ Look up health information
- 16 ☐ Check the stock market
- 17 ☐ Look up recipes
- 18 ☐ Identify exercise activities
- 19 ☐ Other (SPECIFY)

Next

7

Narrative Open Ends

Progress

48%

Navigate : Q6

GO

Back

Next

Quit

LANG

General comments (F6)

Notes linked to a specific question (F5)

New phone number

Q6

What kind of work do/did you do, that is, what is/was your occupation?

[INTERVIEWER CODE ANSWERS VERBATIM]

1

☐

Gave response

8

☐

(VOL) Don't know

9

☐

(VOL) Refused

Next

Progress

49%

Navigate : Q6OE

GO

Back

Next

Quit

LANG

General comments (F6)

Notes linked to a specific question (F5)

New phone number

Q6OE

[INTERVIEWER CODE ANSWERS VERBATIM]

(Q6. What kind of work do/did you do, that is, what is/was your occupation?)

Next



**Appendix C**  
**Descriptive Statistics for Interviewer Behaviors**

**C.1: Percent of Cases Where Interviewer Behaviors Occurred at Least Once During Question Administration**

| Question                                              | n            | Probe        | Feedback     | Clarification | Verification |
|-------------------------------------------------------|--------------|--------------|--------------|---------------|--------------|
| NUMERIC OPEN-ENDS                                     |              |              |              |               |              |
| Q10 # days of exercise last week                      | 449          | 35.86        | 52.34        | 6.90          | 32.07        |
| Q19 # minutes/day on computer                         | 308          | 51.95        | 66.23        | 24.03         | 45.45        |
| Q20 # email messages last week                        | 308          | 33.77        | 62.01        | 14.29         | 32.79        |
| Q21A # times used internet last 7 days                | 307          | 42.35        | 63.19        | 18.24         | 36.16        |
| Q21B # times smoked cigarette last 7 days             | 448          | 22.32        | 44.64        | 4.02          | 27.01        |
| Q21C # times drank alcohol last 7 days                | 448          | 15.63        | 42.63        | 4.91          | 25.89        |
| Q21D # times had sex last 7 days                      | 448          | 12.28        | 46.65        | 3.13          | 11.16        |
| Q21E # times looked at adult website last 7 days      | 448          | 11.61        | 39.29        | 3.57          | 12.95        |
| Q21F # times read book/magazine/newspaper last 7 days | 448          | 43.18        | 51.68        | 12.53         | 36.91        |
| Q22 # parking tickets last year                       | 448          | 7.59         | 26.34        | 2.01          | 12.95        |
| Q23 # Speeding tickets last year                      | 448          | 3.13         | 29.24        | 0.67          | 10.04        |
| Q25 Age                                               | 448          | 3.35         | 38.39        | 0.45          | 18.53        |
| Q32 # people living in household                      | 446          | 7.17         | 33.63        | 0.67          | 19.73        |
| Q33 # adults living in household                      | 446          | 10.76        | 41.93        | 0.67          | 23.54        |
| <i>Mean across all numeric open-ends</i>              | <i>5,847</i> | <i>19.98</i> | <i>44.28</i> | <i>6.00</i>   | <i>23.69</i> |
| CODE INTO NUMERIC RANGE / ORDINAL CATEGORY            |              |              |              |               |              |
| Q9 Hours/week work                                    | 283          | 29.68        | 62.19        | 13.43         | 32.86        |
| Q11 Hours/week leisure                                | 449          | 43.88        | 61.25        | 15.37         | 35.19        |
| Q12 Hours/week TV                                     | 449          | 30.07        | 54.79        | 5.12          | 30.51        |
| Q26 Education                                         | 448          | 27.23        | 60.27        | 1.12          | 30.80        |
| <i>Mean across all numeric range/ordinal category</i> | <i>1,629</i> | <i>33.03</i> | <i>59.36</i> | <i>8.29</i>   | <i>32.29</i> |
| CODE INTO MULTIPLE NOMINAL CATEGORIES                 |              |              |              |               |              |
| Q18 Activities online                                 | 312          | 77.24        | 84.29        | 4.49          | 58.65        |

|                                                  |              |              |              |             |              |
|--------------------------------------------------|--------------|--------------|--------------|-------------|--------------|
| NARRATIVE OPEN-ENDS                              |              |              |              |             |              |
| Q6 Occupation                                    | 431          | 12.30        | 67.52        | 2.09        | 50.35        |
| Q14 Other leisure activities                     | 449          | 34.08        | 75.06        | 2.45        | 57.24        |
| Q21 Favorite leisure activity                    | 448          | 8.48         | 55.36        | 3.35        | 43.53        |
| <i>Mean across all narrative open-ends items</i> | <i>1,328</i> | <i>18.37</i> | <i>65.96</i> | <i>2.64</i> | <i>50.38</i> |
| <i>OVERALL MEAN ACROSS ALL ITEMS</i>             | <i>9,116</i> | <i>24.03</i> | <i>51.50</i> | <i>5.87</i> | <i>30.31</i> |

## APPENDIX D

### Technical Details for Cross-Classified Random Effects Models

To examine whether the types of open-ended questions differed in recording accuracy rates and whether the interviewer behaviors were associated with recording accuracy, we estimated cross-classified random effects logistic regression models. In these models, the recording accuracy indicator ( $Y_{i(j_1, j_2)k} = 1$ ) for each recorded answer ( $i$ ) is cross-classified by respondents ( $j_1$ ) and items ( $j_2$ ), with both respondents and items nested within interviewers ( $k$ ) (See Figure D.1), with random effects for the respondents ( $u_{j_1} \sim N(0, \sigma_{j_1}^2)$ ), items ( $u_{j_2} \sim N(0, \sigma_{j_2}^2)$ ), and interviewers ( $u_k \sim N(0, \sigma_k^2)$ ). The full model, with all of the covariates, is thus:  $\text{logit}(Y_{i(j_1, j_2)k} = 1) = \beta_0 + \sum_{t=1}^T \beta_{1t} QnType_{j_2k} + \sum_{b=1}^B \beta_{2b} IerBehavior_{i(j_1, j_2)k} + \beta_3 IerExperience_k + \beta_4 WithinStudyExperience_{j_1k} + \beta_5 RAge_{j_1k} + \beta_6 RSex_{j_1k} + u_{j_1} + u_{j_2} + u_k$ .

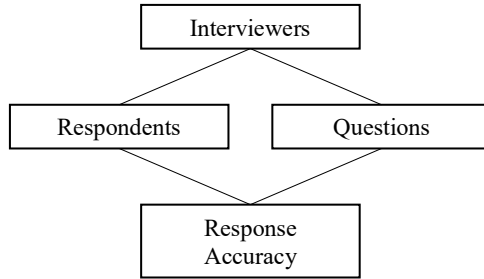

**Figure D.1: Data structure of response accuracy cross-classified by respondents and questions and nested in interviewers**

A cell mean imputation was used to impute missing values on respondent age, and then the imputed age variable was grand mean centered. Missing values on respondent self-reported

sex were imputed using interviewer coding of respondent sex. Interviewer experience and within-study experience were fully observed.

These models were estimated using Stata 15.1 meqrlogit command, with a QR decomposition of the variance components. The code followed the general format

```
meqrlogit correct_recording independentvar1 independentvar2  
[etc.] || _all:R.iverid || _all: R.qnid || Respid:.
```

**Appendix E**  
**Types of Entry Errors**

**E.1: Percent of errors by question type and error type (average across all questions of a similar type).**

| <b>Type of Question</b>                    | <b>n</b> | <b>Number of Questions of this type</b> | <b>Entered wrong substantive answer (i.e., number or category)</b> | <b>Entered substantive response when no answer given or answer was uncodable</b> | <b>Entered “don’t know” or “refused” when a codable answer was provided</b> |
|--------------------------------------------|----------|-----------------------------------------|--------------------------------------------------------------------|----------------------------------------------------------------------------------|-----------------------------------------------------------------------------|
| Numeric                                    | 171      | 14                                      | 45.6%                                                              | 45.0%                                                                            | 9.4%                                                                        |
| Code into numeric range / ordinal category | 96       | 4                                       | 57.3%                                                              | 39.6%                                                                            | 3.1%                                                                        |

Note: Percentages are calculated out of all errors, not out of all respondents.

**Appendix F**  
**Association between Recording Accuracy and Interviewer Behaviors**

**F.1: Number of conversational turns by question**

| Question                               | n            | Mean        | SD          | Min      | Max       |
|----------------------------------------|--------------|-------------|-------------|----------|-----------|
| NUMERIC OPEN-ENDS                      |              |             |             |          |           |
| Q10                                    | 449          | 5.63        | 4.81        | 2        | 42        |
| Q19                                    | 308          | 6.72        | 4.52        | 2        | 38        |
| Q20                                    | 308          | 5.41        | 3.50        | 2        | 27        |
| Q21A                                   | 307          | 5.86        | 3.78        | 2        | 29        |
| Q21B                                   | 448          | 4.05        | 2.77        | 2        | 23        |
| Q21C                                   | 448          | 3.84        | 2.90        | 2        | 33        |
| Q21D                                   | 448          | 3.55        | 2.59        | 2        | 25        |
| Q21E                                   | 448          | 3.27        | 2.17        | 2        | 21        |
| Q21F                                   | 448          | 5.73        | 4.16        | 2        | 27        |
| Q22                                    | 448          | 2.97        | 1.92        | 2        | 17        |
| Q23                                    | 448          | 2.73        | 1.70        | 2        | 27        |
| Q25                                    | 448          | 3.07        | 1.88        | 2        | 19        |
| Q32                                    | 446          | 3.00        | 1.73        | 2        | 22        |
| Q33                                    | 446          | 3.36        | 2.41        | 1        | 27        |
| <i>Mean Across All Numeric Items</i>   | <i>5,847</i> | <i>4.10</i> | <i>3.26</i> | <i>1</i> | <i>42</i> |
| CODE INTO NUMERIC RANGE                |              |             |             |          |           |
| Q9                                     | 283          | 5.34        | 3.75        | 2        | 31        |
| Q11                                    | 449          | 6.09        | 5.20        | 2        | 73        |
| Q12                                    | 449          | 5.03        | 4.06        | 2        | 29        |
| Q26                                    | 448          | 4.56        | 3.24        | 2        | 36        |
| <i>Mean Across All Range/Ordinal</i>   | <i>1,629</i> | <i>5.25</i> | <i>4.20</i> | <i>2</i> | <i>73</i> |
| CODE INTO NOMINAL CATEGORIES           |              |             |             |          |           |
| Q18                                    | 312          | 11.73       | 9.04        | 2        | 67        |
| NARRATIVE OPEN ENDS                    |              |             |             |          |           |
| Q6                                     | 431          | 4.99        | 3.38        | 2        | 29        |
| Q14                                    | 449          | 7.69        | 6.94        | 2        | 75        |
| Q21                                    | 448          | 4.42        | 3.74        | 2        | 55        |
| <i>Mean Across all Narrative Items</i> | <i>1,328</i> | <i>5.71</i> | <i>5.17</i> | <i>2</i> | <i>75</i> |
| <i>OVERALL MEAN (All Items)</i>        | <i>9,116</i> | <i>4.80</i> | <i>4.33</i> | <i>1</i> | <i>75</i> |

Note: Cases with one conversational turn on Q33 (number of people in the household 18 and over) occurred when the interviewer read the question and then entered an answer based on information received in Q32 (number of people living in household) without additional respondent input.

**F.2: Odds ratios for the effect of number of conversational turns on accuracy  
(bivariate)**

|                                                       | n   | Odds Ratio |
|-------------------------------------------------------|-----|------------|
| NUMERIC OPEN-ENDS                                     |     |            |
| Q10 # days of exercise last week                      | 449 | 0.925*     |
| Q19 # minutes/day on computer                         | 308 | 1.01       |
| Q20 # email messages last week                        | 308 | 0.992      |
| Q21A # times used internet last 7 days                | 307 | 1.083      |
| Q21B # times smoked cigarette last 7 days             | 448 | 0.815***   |
| Q21C # times drank alcohol last 7 days                | 448 | 0.936      |
| Q21D # times had sex last 7 days                      | 448 | 0.919      |
| Q21E # times looked at adult website last 7 days      | 448 | 0.828**    |
| Q21F # times read book/magazine/newspaper last 7 days | 447 | 0.928*     |
| Q22 # parking tickets last year                       | 448 | 0.694**    |
| Q23 # Speeding tickets last year                      | 448 | 0.805*     |
| Q25 Age                                               | 448 | 0.864      |
| Q32 # people living in household                      | 446 | 1.095      |
| Q33 # adults living in household                      | 446 | 0.973      |
| CODE INTO NUMERIC RANGE                               |     |            |
| Q9 Hours/week work                                    | 283 | 0.973      |
| Q11 Hours/week leisure                                | 449 | 1.015      |
| Q12 Hours/week TV                                     | 449 | 0.991      |
| Q26 Education                                         | 448 | 0.909*     |
| CODE INTO MULTIPLE NOMINAL CATEGORIES                 |     |            |
| Q18 Activities online                                 | 312 | 0.986      |
| NARRATIVE OPEN ENDS                                   |     |            |
| <i>Themes Accuracy</i>                                |     |            |
| Q6 Occupation                                         | 431 | 0.804***   |
| Q14 Other leisure activities                          | 449 | 0.919***   |
| Q21 Favorite leisure activity                         | 448 | 0.909***   |
| <i>Themes + Elaboration Accuracy</i>                  |     |            |
| Q6 Occupation                                         | 431 | 0.798***   |
| Q14 Other leisure activities                          | 449 | 0.798***   |
| Q21 Favorite leisure activity                         | 448 | 0.702***   |

\*  $p \leq 0.050$ , \*\*  $p \leq 0.010$ , \*\*\*  $p \leq 0.001$

### F.3: Percent Accurate Open-Ended Items by Presence of Interviewer Behaviors

|                                               | n    | <u>Interviewer Probe</u> |       |           | <u>Interviewer Feedback</u> |        |          | <u>Interviewer Clarification</u> |       |         | <u>Interviewer Verification</u> |       |          |
|-----------------------------------------------|------|--------------------------|-------|-----------|-----------------------------|--------|----------|----------------------------------|-------|---------|---------------------------------|-------|----------|
|                                               |      | Yes                      | No    | Diff.     | Yes                         | No     | Diff.    | Yes                              | No    | Diff.   | Yes                             | No    | Diff.    |
| NUMERIC OPEN-ENDS                             |      |                          |       |           |                             |        |          |                                  |       |         |                                 |       |          |
| Q10                                           | 449  | 95.65                    | 98.61 | -2.96     | 96.17                       | 99.07  | -2.90*   | 100.00                           | 97.37 | 2.63*** | 97.92                           | 97.38 | 0.54     |
| Q19                                           | 308  | 91.25                    | 95.27 | -4.02     | 92.64                       | 94.23  | -1.59    | 94.59                            | 92.74 | 1.85    | 95.00                           | 91.67 | 3.33     |
| Q20                                           | 308  | 91.35                    | 95.59 | -4.24     | 92.67                       | 96.58  | -3.91    | 90.90                            | 94.70 | -3.80   | 96.04                           | 93.24 | 2.80     |
| Q21A                                          | 307  | 97.69                    | 93.22 | 4.47*     | 95.88                       | 93.81  | 2.07     | 96.43                            | 94.82 | 1.61    | 92.79                           | 96.43 | -3.64    |
| Q21B                                          | 448  | 93.00                    | 98.56 | -5.56*    | 96.50                       | 97.98  | -1.48    | 83.33                            | 97.91 | -14.58  | 97.52                           | 97.25 | 0.27     |
| Q21C                                          | 448  | 97.14                    | 98.41 | -1.27     | 96.86                       | 99.22  | -2.36    | 100.00                           | 98.12 | 1.88**  | 98.28                           | 98.19 | 0.09     |
| Q21D                                          | 448  | 100.00                   | 96.95 | 3.05**    | 96.17                       | 98.33  | -2.16    | 100.00                           | 97.24 | 2.76**  | 98.00                           | 97.24 | 0.76     |
| Q21E                                          | 448  | 92.31                    | 97.47 | -5.16     | 94.89                       | 98.16  | -3.27    | 93.75                            | 96.99 | -3.24   | 96.55                           | 96.92 | -0.37    |
| Q21F                                          | 447  | 91.19                    | 95.67 | -4.48     | 92.21                       | 95.37  | -3.16    | 94.64                            | 93.61 | 1.03    | 91.52                           | 95.04 | -3.52    |
| Q22                                           | 448  | 97.06                    | 99.52 | -2.46     | 97.46                       | 100.00 | -2.54    | 100.00                           | 99.32 | 0.68    | 98.28                           | 99.49 | -1.21    |
| Q23                                           | 448  | 92.86                    | 99.77 | -6.91     | 99.24                       | 99.68  | -0.44    | 100.00                           | 99.55 | 0.45    | 100.00                          | 99.50 | 0.50     |
| Q25                                           | 448  | 93.33                    | 98.15 | -4.82     | 96.51                       | 98.91  | -2.40    | 100.00                           | 97.98 | 2.02**  | 100.00                          | 97.53 | 2.47**   |
| Q32                                           | 446  | 100.00                   | 98.79 | 1.21*     | 98.67                       | 98.99  | -0.32    | 100.00                           | 98.87 | 1.13*   | 98.86                           | 98.88 | -0.02    |
| Q33                                           | 446  | 95.83                    | 97.24 | -1.41     | 95.72                       | 98.07  | -2.35    | 100.00                           | 97.07 | 2.93**  | 99.05                           | 96.48 | 2.57     |
| Mean                                          | 5847 | 94.18                    | 97.80 | -3.62     | 95.60                       | 98.25  | -2.65    | 95.16                            | 97.20 | -2.04   | 96.61                           | 97.22 | -0.61    |
| CODE INTO NUMERIC RANGE /<br>ORDINAL CATEGORY |      |                          |       |           |                             |        |          |                                  |       |         |                                 |       |          |
| Q9                                            | 283  | 90.48                    | 90.95 | -0.47     | 90.91                       | 90.65  | 0.26     | 86.84                            | 91.43 | -4.59   | 92.47                           | 90.00 | 2.47     |
| Q11                                           | 449  | 96.45                    | 95.63 | 0.82      | 96.00                       | 95.98  | 0.02     | 97.10                            | 95.79 | 1.31    | 96.20                           | 95.88 | 0.32     |
| Q12                                           | 449  | 95.56                    | 94.59 | 0.97      | 94.72                       | 95.07  | -0.35    | 95.65                            | 94.84 | 0.81    | 96.35                           | 94.23 | 2.12     |
| Q26                                           | 448  | 87.70                    | 95.71 | -8.01**   | 92.22                       | 95.51  | -3.29    | 80.00                            | 93.68 | -13.68  | 92.02                           | 94.19 | -2.17    |
| Mean                                          | 1629 | 93.31                    | 94.50 | -1.19     | 93.69                       | 94.71  | -1.02    | 93.33                            | 94.18 | 0.84    | 94.49                           | 93.93 | 0.56     |
| CODE INTO MULTIPLE NOMINAL CATEGORIES         |      |                          |       |           |                             |        |          |                                  |       |         |                                 |       |          |
| Q18                                           | 312  | 47.72                    | 53.52 | -5.80     | 48.67                       | 51.02  | -2.35    | 42.86                            | 49.33 | -6.47   | 45.90                           | 53.49 | -7.59    |
| NARRATIVE OPEN ENDS                           |      |                          |       |           |                             |        |          |                                  |       |         |                                 |       |          |
| Themes Accuracy                               |      |                          |       |           |                             |        |          |                                  |       |         |                                 |       |          |
| Q6                                            | 431  | 73.58                    | 95.24 | -21.66**  | 90.38                       | 97.14  | -6.76**  | 100.00                           | 92.42 | 7.58*** | 90.32                           | 94.86 | -4.54**  |
| Q14                                           | 449  | 72.55                    | 87.16 | -14.61*** | 79.52                       | 90.18  | -10.66** | 63.64                            | 82.65 | -19.01  | 77.04                           | 89.06 | -12.02** |



|                                    |      |       |       |           |       |       |           |       |       |           |       |       |           |
|------------------------------------|------|-------|-------|-----------|-------|-------|-----------|-------|-------|-----------|-------|-------|-----------|
| Q21                                | 448  | 76.32 | 96.34 | -20.02*   | 93.55 | 96.00 | -2.45     | 93.33 | 94.69 | -1.36     | 95.38 | 94.07 | 1.31      |
| Mean                               | 1328 | 73.36 | 93.45 | -20.09*** | 87.10 | 94.91 | -7.81***  | 85.71 | 89.87 | -4.16     | 86.70 | 92.87 | -6.17**   |
| <i>Themes+Elaboration Accuracy</i> |      |       |       |           |       |       |           |       |       |           |       |       |           |
| Q6                                 | 431  | 50.94 | 81.48 | -30.54**  | 72.85 | 87.86 | -15.01*** | 77.78 | 77.73 | 0.05      | 75.58 | 79.91 | -4.33     |
| Q14                                | 449  | 43.79 | 60.14 | -16.35**  | 47.48 | 75.89 | -28.41*** | 9.09  | 55.71 | -46.62*** | 45.14 | 67.19 | -22.05*** |
| Q21                                | 448  | 47.37 | 78.54 | -31.17*** | 67.34 | 86.50 | -19.16*** | 33.33 | 77.37 | -44.04**  | 70.26 | 80.24 | -9.98*    |
| Mean                               | 1328 | 45.90 | 74.54 | -28.64*** | 61.53 | 84.29 | -22.76*** | 37.14 | 70.15 | -33.01*** | 62.33 | 76.33 | -14.00*** |

\* p≤0.050, \*\* p≤0.010, \*\*\* p≤0.001 Significance tests account for clustering within interviewers. Means are pooled across all questions of a single type.

**F.4: Coefficients from cross-classified random effects logistic regression model predicting recording accuracy with question type and interviewer behaviors**

|                                                            | Model 1 |       | Model 2    |       | Model 3    |       | Model 4<br>(Question Type * Any Probing) |       |
|------------------------------------------------------------|---------|-------|------------|-------|------------|-------|------------------------------------------|-------|
|                                                            | Coef    | SE    | Coef       | SE    | Coef       | SE    | Coef                                     | SE    |
| Question type                                              |         |       |            |       |            |       |                                          |       |
| Narrative text                                             |         |       | --         |       | --         |       | --                                       |       |
| Number box                                                 |         |       | 1.325****  | 0.377 | 1.180****  | 0.285 | 0.944**                                  | 0.283 |
| Interviewer code into numeric/ordinal ranges               |         |       | 0.477      | 0.449 | 0.528      | 0.336 | 0.077                                    | 0.332 |
| Interviewer code into nominal categories                   |         |       | -2.494**** | 0.660 | -2.003**** | 0.484 | -2.551****                               | 0.503 |
| Interviewer Behaviors                                      |         |       |            |       |            |       |                                          |       |
| Any probe                                                  |         |       |            |       | -0.650**** | 0.111 | -1.392****                               | 0.211 |
| Any feedback                                               |         |       |            |       | -0.579**** | 0.121 | -0.578****                               | 0.122 |
| Any clarification                                          |         |       |            |       | -0.034     | 0.194 | -0.059                                   | 0.195 |
| Any restate answer/verification                            |         |       |            |       | -0.231*    | 0.109 | -0.220*                                  | 0.110 |
| Question type * Any probing                                |         |       |            |       |            |       |                                          |       |
| Narrative text * Any behavior                              |         |       |            |       |            |       | --                                       |       |
| Number box * Any behavior                                  |         |       |            |       |            |       | 0.756**                                  | 0.272 |
| Interviewer code into numeric/ordinal ranges* Any behavior |         |       |            |       |            |       | 1.275****                                | 0.308 |
| Interviewer code into nominal categories * Any behavior    |         |       |            |       |            |       | 1.143***                                 | 0.355 |
| Interviewer experience                                     |         |       |            |       |            |       |                                          |       |
| Within-survey                                              | 0.011   | 0.007 | 0.011      | 0.007 | 0.010      | 0.007 | 0.011                                    | 0.007 |

|                                          |            |       |           |       |            |       |            |       |
|------------------------------------------|------------|-------|-----------|-------|------------|-------|------------|-------|
| 1+ year overall                          | -0.119     | 0.205 | -0.121    | 0.204 | -0.099     | 0.216 | -0.093     | 0.219 |
| Respondent                               |            |       |           |       |            |       |            |       |
| Age (centered)                           | -0.008*    | 0.003 | -0.008*   | 0.003 | -0.005     | 0.003 | -0.005     | 0.003 |
| Sex                                      | -0.080     | 0.109 | -0.081    | 0.110 | -0.084     | 0.109 | -0.083     | 0.111 |
| Constant                                 | 3.266****  | 0.312 | 2.428**** | 0.388 | 3.078****  | 0.339 | 3.296      | 0.336 |
| Variance components                      |            |       |           |       |            |       |            |       |
| Interviewer                              | 0.116      |       | 0.115     |       | 0.137      |       | 0.140      |       |
| Question                                 | 1.222      |       | 0.308     |       | 0.154      |       | 0.129      |       |
| Respondent                               | 0.132      |       | 0.141     |       | 0.114      |       | 0.129      |       |
| Likelihood Ratio for variance components | 716.62**** |       | 99.15**** |       | 66.98****  |       | 57.96****  |       |
| Model Fit Statistics                     |            |       |           |       |            |       |            |       |
| Log-likelihood                           | -1749.35   |       | -1737.11  |       | -1700.61   |       | -1690.46   |       |
| Wald X2                                  | 9.87*      |       | 58.03**** |       | 165.99**** |       | 200.87**** |       |
| AIC                                      | 3514.71    |       | 3496.21   |       | 3431.22    |       | 3416.92    |       |
| n                                        | 9116       |       | 9116      |       | 9116       |       | 9116       |       |
| $\chi^2$ for overall interaction         |            |       |           |       |            |       | 20.23***   |       |

\* p≤0.050, \*\* p≤0.010, \*\*\* p≤0.001, \*\*\*\* p≤0.0001

**F.4: (Continued)**

|                                                                     | Model 5                      |       | Model 6                           |       | Model 7                            |       |
|---------------------------------------------------------------------|------------------------------|-------|-----------------------------------|-------|------------------------------------|-------|
|                                                                     | (Question Type*Any Feedback) |       | (Question Type*Any Clarification) |       | (Question Type * Any Verification) |       |
|                                                                     | Coef                         | SE    | Coef                              | SE    | Coef                               | SE    |
| Question type                                                       |                              |       |                                   |       |                                    |       |
| Narrative text                                                      | --                           |       | --                                |       | --                                 |       |
| Number box                                                          | 1.086**                      | 0.354 | 1.163****                         | 0.288 | 0.897**                            | 0.315 |
| Interviewer code into numeric/ordinal ranges                        | 0.046                        | 0.404 | 0.515                             | 0.341 | 0.209                              | 0.368 |
| Interviewer code into nominal categories                            | -2.562****                   | 0.576 | -2.008****                        | 0.489 | -2.172****                         | 0.526 |
| Interviewer Behaviors                                               |                              |       |                                   |       |                                    |       |
| Any probe                                                           | -0.646****                   | 0.111 | -0.651****                        | 0.111 | -0.648****                         | 0.111 |
| Any feedback                                                        | -0.848***                    | 0.250 | -0.581****                        | 0.121 | -0.042****                         | 0.195 |
| Any clarification                                                   | -0.030*                      | 0.194 | -0.332*                           | 0.524 | -0.578                             | 0.121 |
| Any restate answer/verification                                     | -0.228                       | 0.109 | -0.231                            | 0.109 | -0.623**                           | 0.202 |
| Question type * Behavior (see column heading for specific behavior) |                              |       |                                   |       |                                    |       |
| Narrative text * Behavior                                           | --                           |       | --                                |       | --                                 |       |
| Number box * Behavior                                               | 0.081                        | 0.299 | 0.384                             | 0.591 | 0.604*                             | 0.270 |
| Interviewer code into numeric/ordinal ranges* Behavior              | 0.678*                       | 0.332 | 0.318                             | 0.645 | 0.671*                             | 0.307 |
| Interviewer code into nominal categories * Behavior                 | 0.687                        | 0.409 | 0.196                             | 0.788 | 0.295                              | 0.315 |
| Interviewer experience                                              |                              |       |                                   |       |                                    |       |
| Within-survey                                                       | 0.010                        | 0.007 | 0.010                             | 0.007 | 0.011                              | 0.007 |
| 1+ year overall                                                     | -0.090                       | 0.215 | -0.098                            | 0.216 | -0.100                             | 0.217 |
| Respondent                                                          |                              |       |                                   |       |                                    |       |
| Age (centered)                                                      | -0.005                       | 0.003 | -0.005                            | 0.003 | -0.005                             | 0.003 |

|                                          |            |       |            |       |            |       |
|------------------------------------------|------------|-------|------------|-------|------------|-------|
| Sex                                      | -0.083     | 0.109 | -0.085     | 0.109 | -0.088     | 0.109 |
| Constant                                 | 3.272****  | 0.376 | 3.090****  | 0.342 | 3.301****  | 0.359 |
| Variance components                      |            |       |            |       |            |       |
| Interviewer                              | 0.135      |       | 0.138      |       | 0.139      |       |
| Question                                 | 0.141      |       | 0.157      |       | 0.159      |       |
| Respondent                               | 0.113      |       | 0.113      |       | 0.107      |       |
| Likelihood Ratio for variance components | 63.49****  |       | 67.09****  |       | 66.12****  |       |
| Model Fit Statistics                     |            |       |            |       |            |       |
| Log-likelihood                           | -1696.94   |       | -1700.39   |       | -1697.13   |       |
| Wald X2                                  | 176.40**** |       | 165.15**** |       | 170.68**** |       |
| AIC                                      | 3429.872   |       | 3436.78    |       | 3430.27    |       |
| n                                        | 9116       |       | 9116       |       | 9116       |       |
| $\chi^2$ for overall interaction         | 7.38       |       | 0.45       |       | 6.79       |       |

\* p≤0.050, \*\* p≤0.010, \*\*\* p≤0.001, \*\*\*\* p≤0.0001

**Appendix G**  
**Association between Recording Accuracy and Interviewer Experience**

**G.1: Percent of entries accurate by job experience**

|                                          | n   | <1 Year | 1 + Years | Diff. | t     |
|------------------------------------------|-----|---------|-----------|-------|-------|
| NUMERIC OPEN ENDS                        |     |         |           |       |       |
| Q10                                      | 449 | 97.44   | 97.59     | -0.15 | -0.11 |
| Q19                                      | 308 | 96.34   | 92.04     | 4.30  | 1.18  |
| Q20                                      | 308 | 91.46   | 95.13     | -3.67 | -1.35 |
| Q21A                                     | 307 | 95.12   | 95.11     | 0.01  | 0.00  |
| Q21B                                     | 448 | 99.14   | 96.69     | 2.45  | 1.91  |
| Q21C                                     | 448 | 97.41   | 98.49     | -1.08 | -0.79 |
| Q21D                                     | 448 | 96.55   | 97.59     | -1.04 | -0.74 |
| Q21E                                     | 448 | 98.28   | 96.39     | 1.89  | 1.43  |
| Q21F                                     | 447 | 96.55   | 92.75     | 3.80  | 1.23  |
| Q22                                      | 448 | 99.14   | 99.40     | -0.26 | -0.30 |
| Q23                                      | 448 | 99.14   | 99.70     | -0.56 | -0.68 |
| Q25                                      | 448 | 98.28   | 97.89     | 0.39  | 0.23  |
| Q32                                      | 446 | 97.37   | 99.40     | -2.03 | -1.74 |
| Q33                                      | 446 | 97.37   | 96.99     | 0.38  | 0.19  |
| CODE TO NUMERIC RANGE / ORDINAL CATEGORY |     |         |           |       |       |
| Q9                                       | 283 | 88.00   | 91.83     | -3.83 | -0.96 |
| Q11                                      | 449 | 94.87   | 96.39     | -1.52 | -0.76 |
| Q12                                      | 449 | 94.02   | 95.18     | -1.16 | -0.40 |
| Q26                                      | 448 | 96.55   | 92.47     | 4.08  | 1.74  |
| CODE TO MULTIPLE NOMINAL CATEGORIES      |     |         |           |       |       |
| Q18                                      | 312 | 52.94   | 47.58     | 5.36  | 0.72  |
| NARRATIVE OPEN-ENDS                      |     |         |           |       |       |
| <i>Themes Accuracy</i>                   |     |         |           |       |       |
| Q6                                       | 431 | 94.55   | 91.90     | 2.65  | 0.99  |
| Q14                                      | 449 | 88.03   | 80.12     | 7.91  | 1.71  |
| Q21                                      | 448 | 96.55   | 93.98     | 2.57  | 1.01  |
| <i>Themes + Elaboration Accuracy</i>     |     |         |           |       |       |
| Q6                                       | 431 | 81.82   | 76.32     | 5.50  | 1.35  |
| Q14                                      | 449 | 58.97   | 53.01     | 5.96  | 0.86  |
| Q21                                      | 448 | 75.00   | 76.20     | -1.20 | -0.42 |

\* p≤0.050, \*\* p≤0.010, \*\*\* p≤0.001

**G.2: Odds ratios, z, and p-values from logistic regression of accuracy on interviewer project experience (bivariate)**

|                                          | <b>n</b> | <b>Odds Ratio</b> | <b>z</b> | <b>p</b> |
|------------------------------------------|----------|-------------------|----------|----------|
| NUMERIC OPEN ENDS                        |          |                   |          |          |
| Q10                                      | 449      | 0.93              | -1.74    | 0.097    |
| Q19                                      | 308      | 1.00              | -0.12    | 0.905    |
| Q20                                      | 308      | 0.98              | -0.42    | 0.676    |
| Q21A                                     | 307      | 1.08              | 1.97     | 0.063    |
| Q21B                                     | 448      | 1.02              | 0.88     | 0.391    |
| Q21C                                     | 448      | 1.00              | 0.06     | 0.956    |
| Q21D                                     | 448      | 1.06              | 1.62     | 0.120    |
| Q21E                                     | 448      | 1.00              | -0.03    | 0.977    |
| Q21F                                     | 447      | 1.01              | 0.42     | 0.677    |
| Q22                                      | 448      | 0.86              | -1.72    | 0.100    |
| Q23                                      | 448      | 0.88              | -1.51    | 0.146    |
| Q25                                      | 448      | 0.98              | -0.52    | 0.612    |
| Q32                                      | 446      | 1.05              | 0.70     | 0.492    |
| Q33                                      | 446      | 0.99              | -0.45    | 0.660    |
| CODE TO NUMERIC RANGE / ORDINAL CATEGORY |          |                   |          |          |
| Q9                                       | 283      | 0.97              | -1.10    | 0.284    |
| Q11                                      | 449      | 0.97              | -1.13    | 0.273    |
| Q12                                      | 449      | 1.06              | 1.70     | 0.104    |
| Q26                                      | 448      | 1.02              | 0.94     | 0.358    |
| CODE TO MULTIPLE NOMINAL CATEGORIES      |          |                   |          |          |
| Q18                                      | 312      | 1.03              | 1.59     | 0.127    |
| NARRATIVE OPEN-ENDS                      |          |                   |          |          |
| <i>Themes Accuracy</i>                   |          |                   |          |          |
| Q6                                       | 432      | 1.00              | 0.10     | 0.921    |
| Q14                                      | 449      | 1.01              | 0.46     | 0.651    |
| Q21                                      | 448      | 1.03              | 0.71     | 0.484    |
| <i>Themes + Elaboration Accuracy</i>     |          |                   |          |          |
| Q6                                       | 432      | 0.99              | -0.61    | 0.551    |
| Q14                                      | 449      | 1.00              | 0.14     | 0.889    |
| Q21                                      | 448      | 0.99              | -0.80    | 0.434    |

Note: A separate logistic regression was estimated for each question.
